# Supplementary material for: Gender Differences in Psychosocial Outcomes and Coping Strategies of Patients with Colorectal Cancer: A Systematic Review
Source: MDPI journal article supplement (doi:10.3390/healthcare11182591), 2023-09-20
Supplement: s1 [file s1]

**Table S1: Methodological Quality of The Included Cross-Sectional Articles**

| Reference                    | Q1 | Q2 | Q3 | Q4 | Q5 | Q6 | Q7 | Q8 | QR |
|------------------------------|----|----|----|----|----|----|----|----|----|
| Acevedo-Ibarra et al. (2021) | Y  | Y  | Y  | Y  | N  | N  | U  | N  | M  |
| Akyol et al. (2015)          | U  | Y  | Y  | NA | N  | N  | Y  | N  | M  |
| Akyol et al. (2015)          | N  | Y  | Y  | Y  | N  | N  | Y  | Y  | M  |
| Al-Shandudi et al. (2022)    | Y  | Y  | Y  | Y  | Y  | Y  | Y  | Y  | H  |
| Alabbas et al. (2016)        | U  | Y  | Y  | Y  | N  | N  | Y  | N  | M  |
| Aminisani et al. (2021)      | Y  | Y  | Y  | NA | Y  | Y  | Y  | Y  | H  |
| Au et al. (2012)             | Y  | Y  | Y  | Y  | N  | N  | Y  | Y  | H  |
| Baldwin et al. (2009)        | Y  | Y  | Y  | Y  | N  | N  | Y  | N  | M  |
| Belachew et al. (2020)       | U  | Y  | Y  | Y  | Y  | Y  | Y  | Y  | H  |
| Braamse et al. (2016)        | Y  | Y  | Y  | Y  | Y  | Y  | Y  | Y  | H  |
| Du et al. (2021)             | Y  | Y  | Y  | Y  | Y  | Y  | Y  | Y  | H  |
| Dunn et al. (2013)           | Y  | Y  | Y  | Y  | Y  | Y  | U  | Y  | H  |
| Eddington et al. (2021)      | Y  | Y  | U  | Y  | Y  | Y  | Y  | Y  | H  |
| Eriksen et al. (2022)        | Y  | Y  | Y  | Y  | N  | N  | Y  | Y  | H  |
| Gautam et al. (2016)         | Y  | Y  | Y  | Y  | Y  | Y  | U  | Y  | H  |
| Giesinger et al. (2009)      | Y  | N  | Y  | Y  | N  | N  | Y  | N  | M  |
| Goldzweig et al. (2009)      | Y  | Y  | Y  | Y  | Y  | Y  | U  | Y  | H  |

|                           |   |   |   |   |   |   |   |   |   |
|---------------------------|---|---|---|---|---|---|---|---|---|
| Han et al. (2020)         | Y | Y | Y | Y | Y | Y | Y | Y | H |
| Kinoshita et al. (2015)   | Y | Y | Y | Y | Y | Y | Y | Y | H |
| Laghousi et al. (2019)    | Y | Y | Y | Y | Y | Y | U | Y | H |
| Mahjoubi et al. (2012)    | Y | Y | Y | Y | N | N | U | N | M |
| Milbury et al. (2013)     | Y | Y | Y | Y | Y | Y | Y | Y | H |
| Mols et al. (2018)        | Y | Y | Y | Y | Y | Y | Y | Y | H |
| Mrabti et al. (2016)      | Y | Y | Y | Y | N | N | Y | N | M |
| Palas et al. (2020)       | Y | N | Y | Y | Y | Y | U | Y | H |
| Pereira et al. (2012)     | Y | Y | Y | Y | N | N | U | Y | M |
| Ran et al. (2016)         | Y | U | U | U | Y | Y | U | Y | M |
| Reese et al. (2018)       | U | Y | Y | Y | Y | Y | U | Y | H |
| Repić et al. (2016)       | Y | Y | U | Y | N | N | Y | U | M |
| Reyes et al. (2017)       | Y | Y | Y | Y | Y | Y | U | Y | H |
| Ristvedt et al. (2009)    | Y | Y | Y | Y | Y | Y | Y | Y | H |
| Tejada et al. (2017)      | Y | Y | Y | Y | Y | Y | Y | Y | H |
| Thong et al. (2019)       | Y | Y | Y | Y | Y | Y | U | Y | H |
| Trinquinato et al. (2017) | Y | Y | Y | Y | N | N | U | N | M |
| Yost et al. (2008)        | Y | Y | Y | Y | Y | Y | Y | Y | H |
| Zhou et al. (2021)        | Y | Y | Y | Y | Y | Y | U | Y | H |
| Zimmaro et al. (2021)     | U | Y | Y | Y | Y | Y | Y | Y | H |

---

All quality ranking of included cross-sectional and longitudinal studies were assessed by JBI Critical Appraisal Checklist for Analytical Cross-Sectional Studies. Y: yes; N: no; U: unclear; NA: not applicable. H: High quality; M: Moderate quality; L: Low quality. Q1: Were the criteria for inclusion in the sample clearly defined? Q2: Were the study subjects and the setting described in detail? Q3: Was the exposure measured in a valid and reliable way? Q4: Were objective, standard criteria used for measurement of the condition? Q5: Were confounding factors identified? Q6: Were strategies to deal with confounding factors stated? Q7: Were the outcomes measured in a valid and reliable way? Q8: Was appropriate statistical analysis used?
